# Supplementary material
Source: HighWire-hosted journal article supplement (https://diabetes.diabetesjournals.org/content/suppl/2007/12/14/db07-0913)
Supplement: db070913OnlineAppendix.pdf [file db070913OnlineAppendix.pdf]

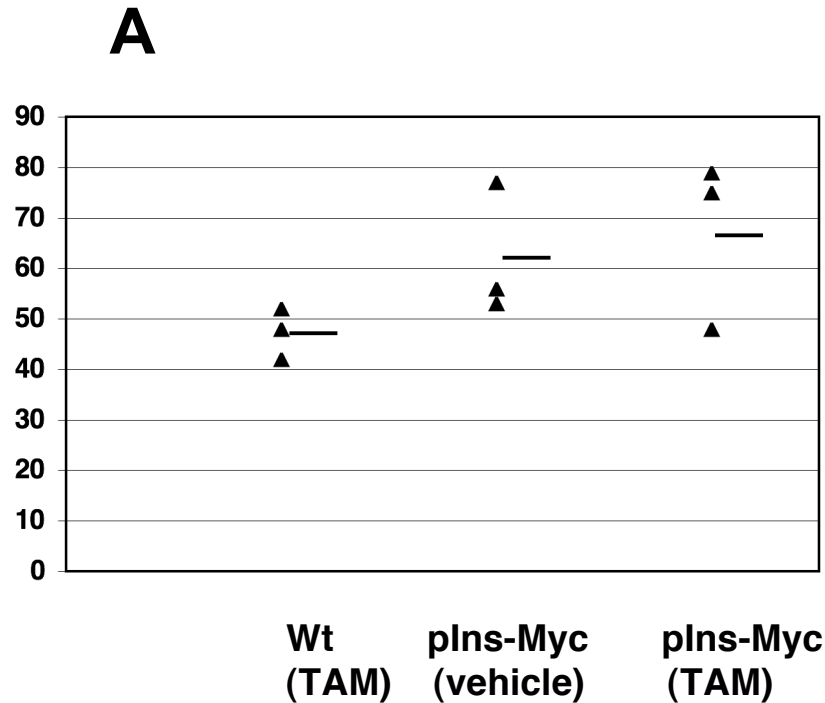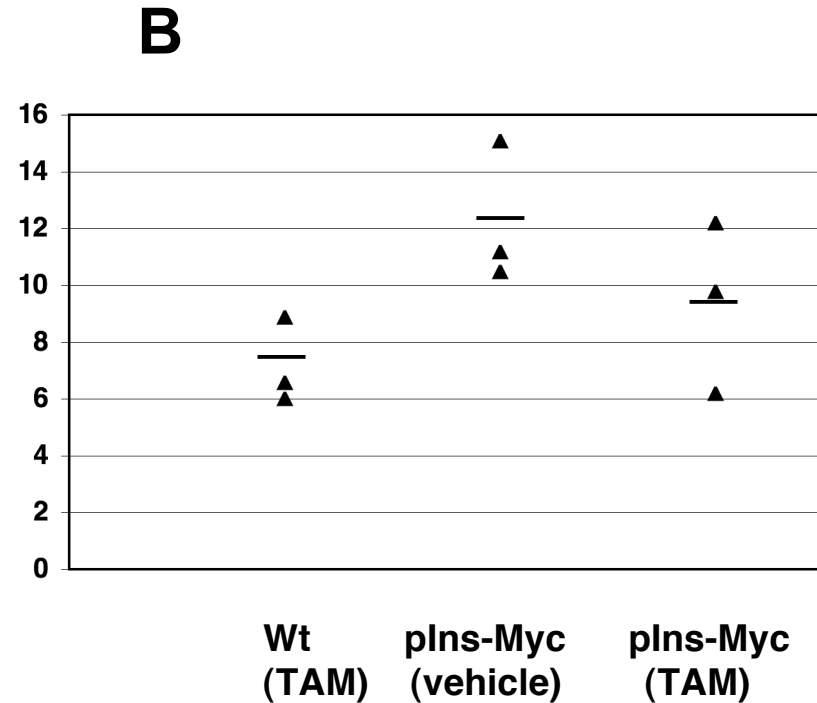

**Supplemental Figure 1.** Quantification of  $\alpha$  (A) and PP-producing cells (B). Morphometric analysis in tamoxifen-treated and vehicle-treated pINS-cMycER<sup>TAM</sup> transgenic mice as well as tamoxifen-treated wild type mice were performed at day 9. The Y axis indicates the number of  $\alpha$  (A) and PP-producing cells (B) per mm<sup>2</sup> of total pancreas area. The horizontal line indicates the average value.

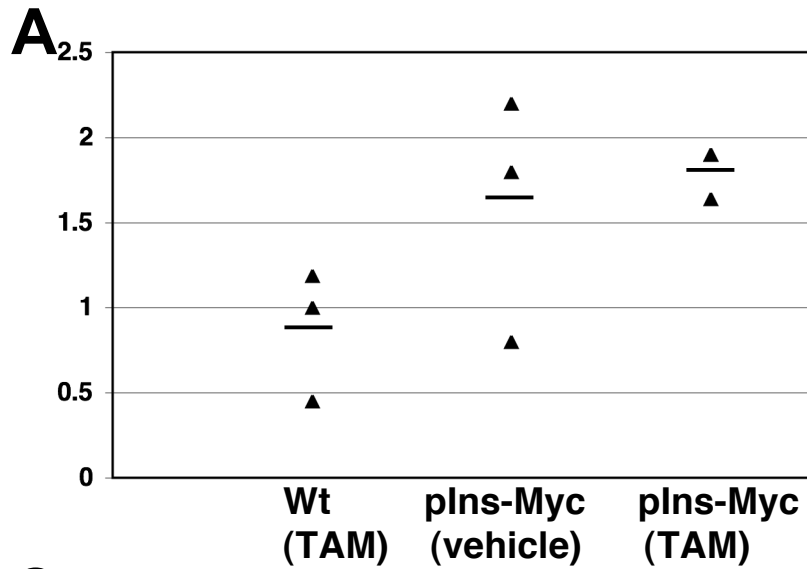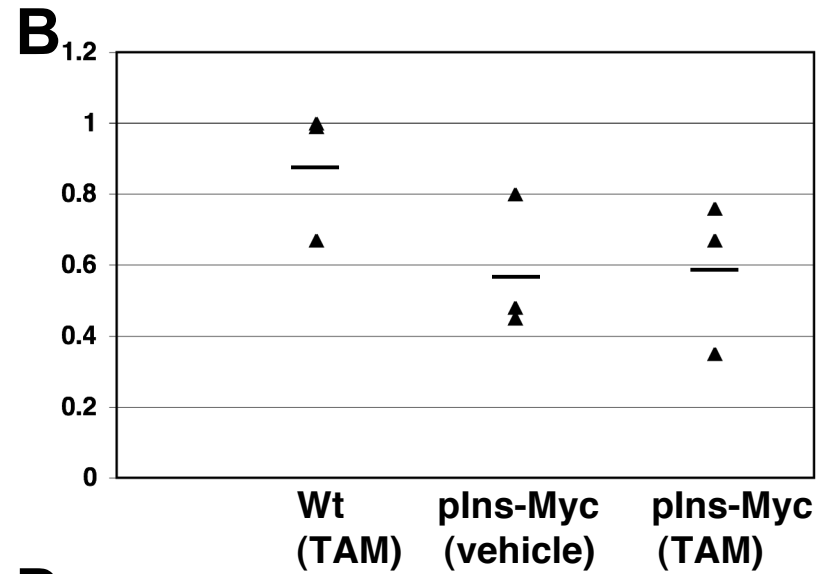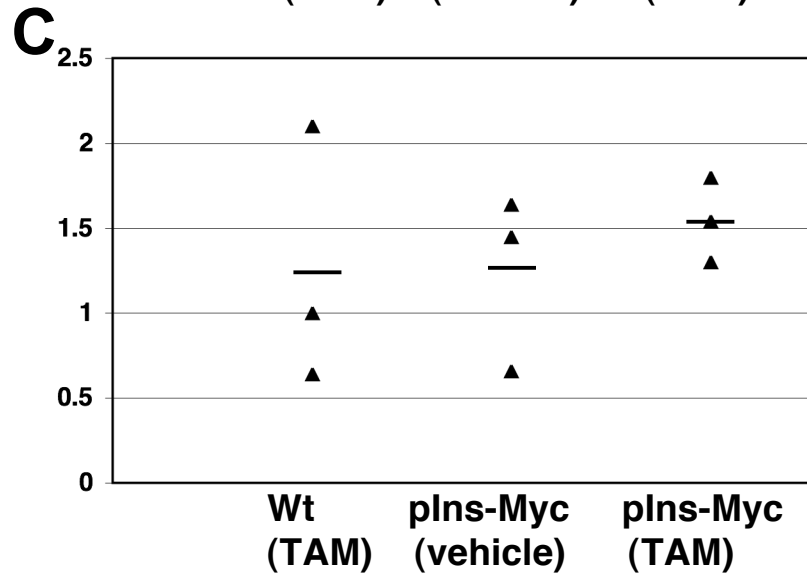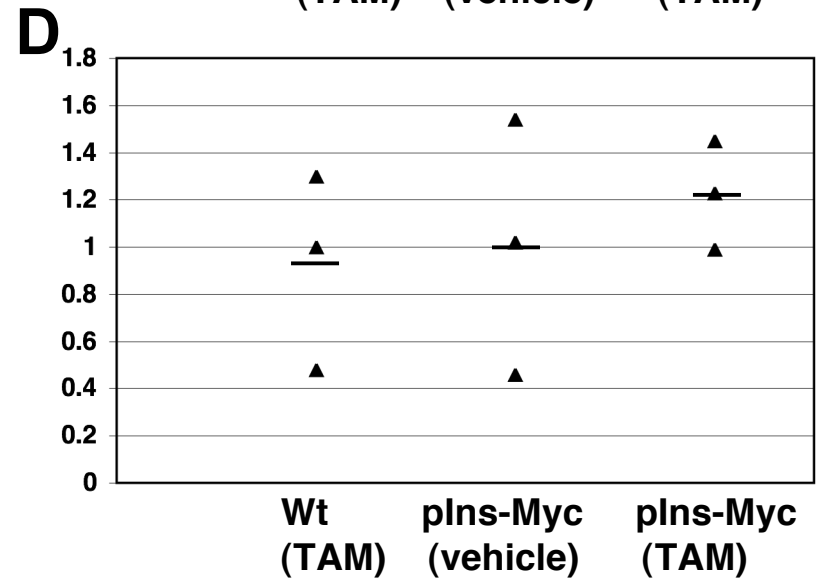

**Supplemental Figure 2.** Quantitative mRNA analysis in regenerated pINS-cMycER<sup>TAM</sup> transgenic mice. Quantitative Real-Time PCR for Glut-2 (A), Islet1 (B), Nkx6.1 (C) and Pax6 (D) in tamoxifen- and vehicle-treated pINS-cMycER<sup>TAM</sup> transgenic mice as well as tamoxifen-treated wild type mice were performed at day 90 (n=3). Wild type values were adjusted to '1' to facilitate comparison. The horizontal line indicates the average value.

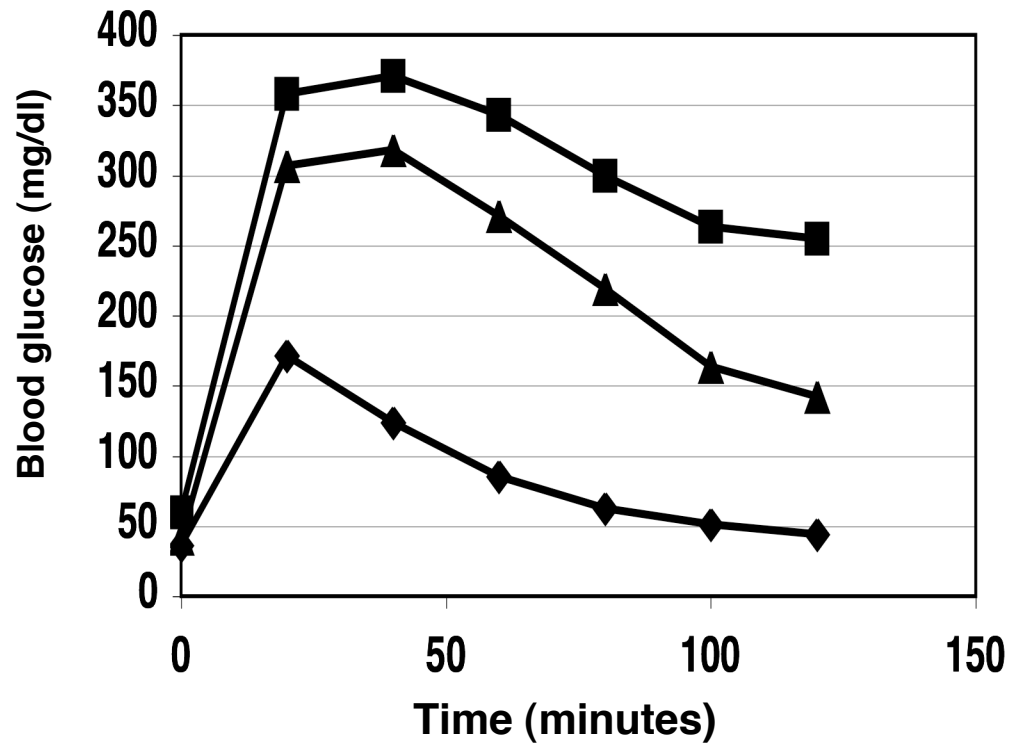

**Supplemental Figure 3.** Impaired response to glucose load in regenerating pINS-cMycER<sup>TAM</sup> transgenic mice. pINS-cMycER<sup>TAM</sup> transgenic mice were assessed for their response to glucose before treatment (diamonds) and after treatment on day 24 (squares) and day 40 (triangles).

| <b>Gene</b>   | <b>Primer sequence</b>  |
|---------------|-------------------------|
| <b>Glut-2</b> |                         |
| F             | AGTGGGCGGAATGGTCG       |
| R             | TGCTTTGATCCTTCCAAGTTTGT |
| <b>Islet1</b> |                         |
| F             | AGACCCTCTCAGTCCCTTGCA   |
| R             | TAGCCGAGATGGGTTTCGG     |
| <b>Nkx6.1</b> |                         |
| F             | ACGCTTGGCCTATTCTCTGG    |
| R             | CGTGCTTCTTTCTCCACTTGGT  |
| <b>Pax6</b>   |                         |
| F             | TGCGACATTTCCCGAATTCT    |
| R             | ACAACCGTTGGATACGTTTTCA  |

**Supplemental Table 1.** Sequence of primers used for Real Time PCR analysis.
